# Supplementary material for: Increased CCL24 and CXCL7 levels in the cerebrospinal fluid of patients with neurosyphilis
Source: PubMed Central journal article supplement (PMC7521312; doi:10.1002/jcla.23366), 2020-05-17
Supplement: JCLA-34-e23366-s002.pdf [file JCLA-34-e23366-s002.pdf]

**Supplement to Increased CCL24 and CXCL7 in the cerebrospinal fluid of patients  
with neurosyphilis**

**Supplement table 1. Characteristics of the study population.**

|                                | Neurosyphilis     | Non-neurosyphilis | P Value |
|--------------------------------|-------------------|-------------------|---------|
| Male (%)                       | 32/46(70)         | 26/47(55)         | ND      |
| Age (Median,IQR)               | 57(51-64)         | 51(39-64)         | 0.1441  |
| 1/Serum RPR titer (Median,IQR) | 8(2-32)           | 4(0-8)            | <0.0002 |
| 1/CSF VDRL titer (Median,IQR)  | 1(0-4)            | 0                 | <0.0001 |
| CSF cell count (Median,IQR)    | 8(4-41.5)         | 4(2-6)            | <0.0001 |
| CSF protein (Median,IQR)       | 68.75(52.3-82.24) | 34.4(28.5-41.6)   | <0.0001 |
| CSF glu (Median,IQR)           | 3.69(3.08-4.05)   | 3.93(3.44-4.31)   | 0.0518  |
| Treatment (%)                  | 16/46(35)         | 22/47(47)         | ND      |

CSF, cerebrospinal fluid; CSF protein reference range 8-43mg/dL; CSF cell count

reference range  $<8 \times 10^6/L$ ; CSF glu, glucose, reference range 2.2-3.9mmol/L; IQR,

interquartile range; ND, not done; RPR, rapid plasma reagin; VDRL, Venereal Disease

Research Laboratories.

**Supplement table 2. Demographic and clinical characteristics of the study population.**

| Num<br>ber | Sex        | A<br>ge | Confir<br>mat<br>ion<br>time | Treat<br>ment<br>history | Seru<br>m<br>RPR<br>titre | Seru<br>m<br>TPP<br>A | CS<br>F<br>R<br>P<br>R<br>tit<br>re | CSF<br>TPP<br>A | CSF findings      |             |          |
|------------|------------|---------|------------------------------|--------------------------|---------------------------|-----------------------|-------------------------------------|-----------------|-------------------|-------------|----------|
|            |            |         |                              |                          |                           |                       |                                     |                 | Cell<br>cou<br>nt | Prot<br>ein | Gl<br>u  |
| 1          | Fem<br>ale | 56      | 3 years                      | Benzathine penicillin    | 1:51<br>2+                | +                     | 1:1<br>6+                           | +               | 54                | 111.7       | 3.3<br>5 |
| 2          | Fem<br>ale | 70      | 1 month                      | Benzathine penicillin    | 1:12<br>8+                | +                     | 1:1<br>6+                           | +               | 219               | 92.56       | 2.5<br>1 |
| 3          | Male       | 63      | After<br>admission           | Unknown                  | 1:64<br>+                 | +                     | 1:1<br>6+                           | +               | 62                | 137.1       | 2.6<br>4 |
| 4          | Male       | 64      | 3 months                     | Benzathine penicillin    | 1:64<br>+                 | +                     | 1:1<br>6+                           | +               | 40                | 103.2       | 4.0<br>2 |
| 5          | Fem<br>ale | 55      | 4 months                     | Unknown                  | 1:32<br>+                 | +                     | 1:8<br>+                            | +               | 14                | 78.5        | 2.8<br>8 |

|    |        |    |                 |                                       |           |   |          |   |          |       |          |
|----|--------|----|-----------------|---------------------------------------|-----------|---|----------|---|----------|-------|----------|
| 6  | Female | 55 | 4 months        | Unknown                               | 1:32<br>+ | + | 1:8<br>+ | + | 14       | 78.5  | 2.8<br>8 |
| 7  | Female | 40 | After admission | Unknown                               | 1:64<br>+ | + | 1:4<br>+ | + | 35       | 52.4  | 2.7<br>5 |
| 8  | Female | 58 | After admission | Unknown                               | 1:64<br>+ | + | 1:4<br>+ | + | 60       | 73.6  | 4.0<br>5 |
| 9  | Female | 51 | 1 month         | Unknown                               | 1:64<br>+ | + | 1:4<br>+ | + | 80       | 64.1  | 5.1<br>4 |
| 10 | Female | 55 | 5 months        | Unknown                               | 1:32<br>+ | + | 1:4<br>+ | + | 4        | 72.9  | 3.5<br>4 |
| 11 | Male   | 64 | After admission | No prior treatment                    | 1:32<br>+ | + | 1:4<br>+ | + | 150      | 50.2  | 3.8<br>8 |
| 12 | Male   | 68 | 1 year          | Unknown                               | 1:16<br>+ | + | 1:4<br>+ | + | 40       | 53.02 | 3.8<br>2 |
| 13 | Male   | 74 | 3 weeks         | Unknown                               | 1:64<br>+ | + | 1:2<br>+ | + | 6        | 47.2  | 3.9<br>6 |
| 14 | Male   | 57 | 3 years         | Benzathine penicillin                 | 1:32<br>+ | + | 1:2<br>+ | + | 18       | 74.9  | 3.9<br>2 |
| 15 | Male   | 54 | 9 months        | Ceftriaxone                           | 1:16<br>+ | + | 1:2<br>+ | + | 6        | 78.8  | 3.6<br>7 |
| 16 | Male   | 52 | 2 months        | Unknown                               | 1:8+      | + | 1:2<br>+ | + | 98       | 51.5  | 3.3<br>4 |
| 17 | Male   | 50 | 1 month         | Unknown                               | 1:8+      | + | 1:2<br>+ | + | 50       | 77.2  | 3.7<br>8 |
| 18 | Male   | 36 | 10 months       | Ceftriaxone                           | 1:32<br>+ | + | 1:1<br>+ | + | 6        | 47.1  | 3.4      |
| 19 | Male   | 60 | 7 years         | Unknown                               | 1:32<br>+ | + | 1:1<br>+ | + | 46       | 63    | 8.2<br>2 |
| 20 | Female | 59 | 11 months       | Benzathine penicillin                 | 1:16<br>+ | + | 1:1<br>+ | + | 4        | 29.7  | 3.2<br>9 |
| 21 | Male   | 67 | 1 month         | Unknown                               | 1:8+      | + | 1:1<br>+ | + | 16       | 103.7 | 2.6<br>6 |
| 22 | Male   | 59 | 3 years         | Unknown                               | 1:8+      | + | 1:1<br>+ | + | 4        | 41.2  | 2.5      |
| 23 | Male   | 60 | 0.5 month       | Unknown                               | 1:4+      | + | 1:1<br>+ | + | 8        | 112   | 4.2<br>9 |
| 24 | Male   | 49 | 4 years         | Unknown                               | 1:4+      | + | 1:1<br>+ | + | 10       | 64.9  | 3.4<br>3 |
| 25 | Male   | 64 | 6 years         | Unknown                               | 1:2+      | + | 1:1<br>+ | + | 2        | 56.3  | 3.1      |
| 26 | Female | 54 | After admission | Unknown                               | 1:2+      | + | 1:1<br>+ | + | 151<br>5 | 74.8  | 4.1<br>6 |
| 27 | Male   | 49 | 3 years         | Benzathine penicillin                 | 1:32<br>+ | + | -        | + | 4        | 77.1  | 3.4<br>6 |
| 28 | Female | 69 | 10 months       | Unknown                               | 1:8+      | + | -        | + | 12       | 96.6  | 3.0<br>5 |
| 29 | Male   | 45 | 2 months        | Benzathine penicillin                 | 1:8+      | + | -        | + | 4        | 54.6  | 4.0<br>2 |
| 30 | Male   | 37 | 10 years        | Benzathine penicillin                 | 1:8+      | + | -        | + | 4        | 48.6  | 3.6<br>1 |
| 31 | Male   | 46 | 1 year          | No prior treatment                    | 1:8+      | + | -        | + | 8        | 54    | 4.0<br>5 |
| 32 | Male   | 58 | 1 month         | Unknown                               | 1:4+      | + | -        | + | 2        | 267.5 | 3.7<br>1 |
| 33 | Male   | 64 | After admission | Unknown                               | 1:4+      | + | -        | + | 1        | 53.5  | 5.4<br>7 |
| 34 | Female | 55 | 3 years         | Benzathine penicillin,<br>Ceftriaxone | 1:4+      | + | -        | + | 8        | 61.8  | 3.0<br>9 |
| 35 | Male   | 28 | After admission | Unknown                               | 1:4+      | + | -        | + | 918      | 128.2 | 2.3<br>9 |
| 36 | Male   | 56 | 1 year          | Benzathine penicillin                 | 1:2+      | + | -        | + | 2        | 45.8  | 3.9<br>8 |

|    |        |    |                 |                       |            |   |   |   |    |       |          |
|----|--------|----|-----------------|-----------------------|------------|---|---|---|----|-------|----------|
| 37 | Male   | 54 | 1 month         | Benzathine penicillin | 1:2+       | + | - | + | 4  | 50.6  | 3.8<br>1 |
| 38 | Female | 58 | 10 months       | Unknown               | 1:2+       | + | - | + | 10 | 73.8  | 3.1<br>9 |
| 39 | Male   | 60 | After admission | Unknown               | 1:2+       | + | - | + | 12 | 77.7  | 2.8<br>1 |
| 40 | Male   | 39 | 6 months        | Aqueous penicillin    | 1:2+       | + | - | + | 0  | 47.2  | 3.8<br>4 |
| 41 | Male   | 38 | 5 months        | Unknown               | 1:2+       | + | - | + | 8  | 53    | 4.5<br>3 |
| 42 | Male   | 66 | 2 years         | Benzathine penicillin | 1:1+       | + | - | + | 4  | 55.1  | 4.1<br>2 |
| 43 | Male   | 56 | 3 years         | Benzathine penicillin | 1:1+       | + | - | + | 6  | 108.2 | 4.4<br>5 |
| 44 | Male   | 64 | Several years   | Unknown               | 1:1+       | + | - | + | 6  | 116.5 | 5.1<br>3 |
| 45 | Male   | 65 | 10 years        | Unknown               | -          | + | - | + | 0  | 72.6  | 5.7<br>4 |
| 46 | Female | 57 | Unknown         | Unknown               | -          | + | - | + | 6  | 52    | 2.7      |
| 47 | Female | 52 | 4 months        | Unknown               | 1:12<br>8+ | + | - | + | 0  | 32.5  | 4.2<br>7 |
| 48 | Female | 45 | 17 years        | Benzathine penicillin | 1:16<br>+  | + | - | + | 4  | 23.5  | 3.4<br>4 |
| 49 | Male   | 75 | 5 years         | Benzathine penicillin | 1:8+       | + | - | + | 4  | 40    | 4.8<br>4 |
| 50 | Male   | 40 | 10 months       | Benzathine penicillin | 1:8+       | + | - | + | 4  | 39    | 3.2<br>2 |
| 51 | Male   | 47 | 1 year          | Ceftriaxone           | 1:8+       | + | - | + | 6  | 27.8  | 3.7<br>8 |
| 52 | Female | 51 | 2 years         | Benzathine penicillin | 1:8+       | + | - | + | 6  | 41.6  | 3.3<br>5 |
| 53 | Male   | 52 | Unknown         | Unknown               | 1:8+       | + | - | + | 6  | 42.4  | 3.2      |
| 54 | Male   | 49 | 2 years         | Unknown               | 1:4+       | + | - | + | 0  | 34.3  | 3.5<br>6 |
| 55 | Male   | 48 | 3 years         | Benzathine penicillin | 1:4+       | + | - | + | 1  | 27.5  | 3.7<br>4 |
| 56 | Male   | 55 | 1.5 years       | Benzathine penicillin | 1:4+       | + | - | + | 1  | 38.4  | 4.0<br>5 |
| 57 | Male   | 63 | 1 year          | Unknown               | 1:2+       | + | - | + | 6  | 30.5  | 3.0<br>8 |
| 58 | Male   | 20 | 2 years         | Benzathine penicillin | 1:16<br>+  | + | - | - | 2  | 28.5  | 3.7<br>8 |
| 59 | Female | 37 | 2 years         | Unknown               | 1:16<br>+  | + | - | - | 4  | 29.8  | 3.4<br>9 |
| 60 | Female | 67 | 2 years         | Benzathine penicillin | 1:16<br>+  | + | - | - | 6  | 50    | 4.1<br>8 |
| 61 | Male   | 72 | 1 year          | Benzathine penicillin | 1:8+       | + | - | - | 2  | 32.5  | 4.0<br>2 |
| 62 | Female | 23 | 3 years         | Unknown               | 1:8+       | + | - | - | 2  | 22.7  | 3.3      |
| 63 | Female | 31 | 3 years         | Benzathine penicillin | 1:8+       | + | - | - | 0  | 36.2  | 3.4<br>9 |
| 64 | Male   | 75 | Over 20 years   | Unknown               | 1:4+       | + | - | - | 4  | 36.8  | 4.0<br>1 |
| 65 | Male   | 50 | 6 years         | Benzathine penicillin | 1:4+       | + | - | - | 6  | 27.9  | 3.9<br>5 |
| 66 | Male   | 30 | 2 years         | Benzathine penicillin | 1:4+       | + | - | - | 6  | 38.2  | 3.6<br>2 |
| 67 | Male   | 21 | 3 years         | Benzathine penicillin | 1:4+       | + | - | - | 6  | 39.9  | 3.3<br>5 |

|    |            |    |                    |                       |      |   |   |   |    |      |          |
|----|------------|----|--------------------|-----------------------|------|---|---|---|----|------|----------|
| 68 | Fem<br>ale | 33 | 2 years            | Benzathine penicillin | 1:4+ | + | - | - | 0  | 28.5 | 3.4      |
| 69 | Male       | 63 | 5 years            | Benzathine penicillin | 1:4+ | + | - | - | 0  | 55.1 | 4.3<br>1 |
| 70 | Fem<br>ale | 19 | 3.5 years          | Unknown               | 1:4+ | + | - | - | 1  | 25.6 | 3.4<br>1 |
| 71 | Fem<br>ale | 72 | 2 years            | Benzathine penicillin | 1:4+ | + | - | - | 4  | 29.1 | 4.4<br>9 |
| 72 | Fem<br>ale | 47 | After<br>admission | Unknown               | 1:4+ | + | - | - | 2  | 18.2 | 4.1      |
| 73 | Fem<br>ale | 41 | 3 years            | Benzathine penicillin | 1:2+ | + | - | - | 2  | 32.6 | 3.4<br>5 |
| 74 | Fem<br>ale | 39 | 3 years            | Benzathine penicillin | 1:2+ | + | - | - | 4  | 32.9 | 4.9<br>1 |
| 75 | Fem<br>ale | 64 | 10 years           | Benzathine penicillin | 1:2+ | + | - | - | 4  | 62.7 | 3.6<br>9 |
| 76 | Male       | 59 | 1 year             | Benzathine penicillin | 1:2+ | + | - | - | 0  | 35.2 | 4.8<br>1 |
| 77 | Male       | 78 | After<br>admission | Unknown               | 1:1+ | + | - | - | 0  | 40.3 | 3.9<br>3 |
| 78 | Fem<br>ale | 56 | 10 months          | Unknown               | 1:1+ | + | - | - | 4  | 32.9 | 3.8      |
| 79 | Male       | 33 | 1 month            | Unknown               | 1:1+ | + | - | - | 6  | 29.7 | 4.9<br>1 |
| 80 | Fem<br>ale | 31 | 9 years            | Benzathine penicillin | 1:1+ | + | - | - | 10 | 33.4 | 3.3<br>8 |
| 81 | Fem<br>ale | 66 | 5 years            | Unknown               | -    | + | - | - | 2  | 25.7 | 8.0<br>3 |
| 82 | Male       | 78 | After<br>admission | Unknown               | -    | + | - | - | 0  | 51.1 | 5.1<br>4 |
| 83 | Male       | 56 | Unknown            | Unknown               | -    | + | - | - | 2  | 38.8 | 5.2<br>8 |
| 84 | Fem<br>ale | 31 | 5 years            | Unknown               | -    | + | - | - | 4  | 28.2 | 3.0<br>8 |
| 85 | Fem<br>ale | 53 | 1 year             | Unknown               | -    | + | - | - | 2  | 25.3 | 4.1      |
| 86 | Male       | 45 | 3 years            | Unknown               | -    | + | - | - | 4  | 28.4 | 3.9<br>5 |
| 87 | Fem<br>ale | 51 | After<br>admission | Unknown               | -    | + | - | - | 2  | 39.4 | 4.5<br>3 |
| 88 | Fem<br>ale | 58 | 1 year             | Unknown               | -    | + | - | - | 2  | 48.7 | 3.5<br>5 |
| 89 | Male       | 65 | 2 years            | No prior treatment    | -    | + | - | - | 2  | 71.5 | 5.3<br>9 |
| 90 | Male       | 68 | Unknown            | Unknown               | -    | + | - | - | 6  | 71   | 3.9<br>4 |
| 91 | Male       | 51 | 20 days            | Unknown               | -    | + | - | - | 8  | 54.7 | 4.1<br>3 |
| 92 | Male       | 61 | After<br>admission | Unknown               | -    | + | - | - | 6  | 64.1 | 3.4      |
| 93 | Male       | 83 | After<br>admission | Unknown               | -    | + | - | - | 5  | 57.7 | 4.8      |

CSF, cerebrospinal fluid; CSF Protein reference range 8-43mg/dL; CSF cell count

reference range  $<8 \times 10^6/L$ ; Glu, glucose, reference range 2.2-3.9mmol/L; RPR, rapid

plasma reagin; TPPA, T pallidum particle agglutination; VDRL, venereal disease research laboratories.

**Supplement table 3. Demographic and clinical characteristics of the 4 neurosyphilis and 4 non-neurosyphilis patients.**

| Number | Sex    | Age | Confirmation time  | Treatment history     | Serum RPR titer | Serum TPPA | CSF VDRL titer | CSF TPPA | CSF findings |         |      |
|--------|--------|-----|--------------------|-----------------------|-----------------|------------|----------------|----------|--------------|---------|------|
|        |        |     |                    |                       |                 |            |                |          | Cell count   | Protein | Glu  |
| 1      | Female | 56  | 3 years            | Benzathine penicillin | 1:512+          | +          | 1:16+          | +        | 54           | 111.7   | 3.35 |
| 2      | Female | 70  | 1 month            | Benzathine penicillin | 1:128+          | +          | 1:16+          | +        | 219          | 92.56   | 2.51 |
| 3      | Male   | 64  | 3 months           | Benzathine penicillin | 1:64+           | +          | 1:16+          | +        | 40           | 103.2   | 4.02 |
| 4      | Male   | 63  | After admission    | Unknown               | 1:64+           | +          | 1:16+          | +        | 62           | 137.1   | 2.64 |
| 5      | Female | 37  | 2 years            | Benzathine penicillin | 1:16+           | +          | -              | -        | 4            | 29.8    | 3.49 |
| 6      | Female | 31  | 3 years            | Benzathine penicillin | 1:8+            | +          | -              | -        | 0            | 36.2    | 3.49 |
| 7      | Male   | 50  | 6 years            | Benzathine penicillin | 1:4+            | +          | -              | -        | 6            | 27.9    | 3.95 |
| 8      | Male   | 75  | More than 20 years | Unknown               | 1:4+            | +          | -              | -        | 4            | 36.8    | 4.01 |

CSF, cerebrospinal fluid; CSF Protein reference range 8-43mg/dL; CSF cell count reference range  $<8 \times 10^6/L$ ; Glu, glucose, reference range 2.2-3.9mmol/L; RPR, rapid plasma reagin; TPPA, T pallidum particle agglutination; VDRL, venereal disease research laboratories.

**Supplement figure 1. Correlations between the CSF CCL24, CXCL7 level and CSF protein concentration, CSF cell count, CSF VDRL titer and serum RPR titer.** CSF Protein concentration, CSF cell count, CSF VDRL titer, and serum RPR titer are plotted against CSF CCL24 (A, B, C, D) and CXCL7 levels (E, F, G, H). Each circle represents one individual. The straight line in each graph is the result of linear regression analysis. Spearman correlation analysis was performed, and Spearman's correlating coefficients  $r$  and  $p$  values are shown. RPR, rapid plasma reagin; VDRL, Venereal Disease Research

Laboratories.
